# Supplementary material
Source: PubMed Central journal article supplement (PMC6166207)
Supplement: kwy115_tasevska_web_material_final.pdf [file kwy115_tasevska_web_material_final.pdf]

**Supplementary material for Biomarker-calibrated total sugars intake and risk of type 2 diabetes and cardiovascular disease in the Women’s Health Initiative Observational Study**

**Web Table 1. Hazard Ratios and 95% CI for Specific Cardiovascular Disease Outcomes by 20% Increase of Calibrated and Uncalibrated Total Sugars Intake from Energy Substitution and Energy Partition Models in WHI Observational Study, From Baseline (1993-1998) through September 30, 2010 (n = 64,751)**

| Model                                       | Calibrated total sugars <sup>a</sup> |            |                  |            | Uncalibrated total sugars <sup>a</sup> |            |                  |            |
|---------------------------------------------|--------------------------------------|------------|------------------|------------|----------------------------------------|------------|------------------|------------|
|                                             | Energy substitution                  |            | Energy partition |            | Energy substitution                    |            | Energy partition |            |
|                                             | HR                                   | 95% CI     | HR               | 95% CI     | HR                                     | 95% CI     | HR               | 95% CI     |
| <b>Nonfatal MI<sup>b</sup></b>              |                                      |            |                  |            |                                        |            |                  |            |
| <b>Age- and energy-adjusted<sup>c</sup></b> | 0.97                                 | 0.93, 1.02 | 1.00             | 0.90, 1.11 | 0.95                                   | 0.92, 0.97 | 0.95             | 0.93, 0.98 |
| <b>Multivariable 1<sup>d</sup></b>          | 0.96                                 | 0.85, 1.09 | 0.87             | 0.76, 0.98 | 0.98                                   | 0.94, 1.02 | 0.99             | 0.96, 1.02 |
| <b>Multivariable 2<sup>e</sup></b>          | 0.96                                 | 0.81, 1.14 | 0.87             | 0.78, 0.97 | 0.98                                   | 0.95, 1.02 | 0.99             | 0.96, 1.02 |
| <b>Coronary death<sup>b</sup></b>           |                                      |            |                  |            |                                        |            |                  |            |
| <b>Age- and energy-adjusted</b>             | 0.91                                 | 0.87, 0.96 | 0.91             | 0.80, 1.04 | 0.93                                   | 0.90, 0.97 | 0.94             | 0.91, 0.97 |
| <b>Multivariable 1</b>                      | 0.94                                 | 0.73, 1.20 | 0.97             | 0.78, 1.20 | 0.96                                   | 0.91, 1.02 | 0.97             | 0.93, 1.02 |

|                                    |      |            |      |            |      |             |      |            |
|------------------------------------|------|------------|------|------------|------|-------------|------|------------|
| <b>Multivariable 2</b>             | 0.93 | 0.70, 1.25 | 0.93 | 0.79, 1.09 | 0.97 | 0.92, 1.03  | 0.98 | 0.94, 1.02 |
| <b>Heart failure<sup>b</sup></b>   |      |            |      |            |      |             |      |            |
| <b>Age- and energy-adjusted</b>    | 0.95 | 0.90, 0.99 | 1.05 | 0.92, 1.21 | 0.93 | 0.90, 0.95  | 0.94 | 0.92, 0.97 |
| <b>Multivariable 1</b>             | 0.91 | 0.72, 1.14 | 0.97 | 0.71, 1.32 | 0.94 | 0.90, 0.98  | 0.95 | 0.92, 0.99 |
| <b>Multivariable 2</b>             | 0.91 | 0.61, 1.37 | 0.87 | 0.72, 1.06 | 0.95 | 0.91, 0.99  | 0.96 | 0.93, 1.00 |
| <b>CABG<sup>b</sup></b>            |      |            |      |            |      |             |      |            |
| <b>Age- and energy-adjusted</b>    | 1.02 | 0.97, 1.07 | 1.14 | 1.02, 1.27 | 0.94 | 0.91, 0.98  | 0.95 | 0.92, 0.98 |
| <b>Multivariable 1</b>             | 0.93 | 0.76, 1.14 | 0.84 | 0.69, 1.03 | 0.94 | 0.90, 0.98) | 0.95 | 0.91, 0.99 |
| <b>Multivariable 2</b>             | 0.93 | 0.67, 1.30 | 0.83 | 0.70, 0.98 | 0.94 | 0.90, 0.99  | 0.95 | 0.91, 0.99 |
| <b>PCI<sup>b</sup></b>             |      |            |      |            |      |             |      |            |
| <b>Age- and energy-adjusted</b>    | 1.02 | 0.97, 1.07 | 1.07 | 0.97, 1.18 | 0.95 | 0.92, 0.97  | 0.95 | 0.93, 0.97 |
| <b>Multivariable 1</b>             | 0.97 | 0.83, 1.12 | 0.84 | 0.74, 0.96 | 0.96 | 0.93, 1.00  | 0.97 | 0.94, 1.00 |
| <b>Multivariable 2</b>             | 0.97 | 0.72, 1.29 | 0.84 | 0.75, 0.95 | 0.97 | 0.93, 1.00  | 0.97 | 0.95, 1.00 |
| <b>Ischemic stroke<sup>b</sup></b> |      |            |      |            |      |             |      |            |
| <b>Age- and energy-adjusted</b>    | 0.97 | 0.92, 1.02 | 0.98 | 0.91, 1.06 | 0.96 | 0.94, 0.99  | 0.97 | 0.94, 0.99 |
| <b>Multivariable 1</b>             | 0.99 | 0.83, 1.18 | 1.02 | 0.89, 1.17 | 1.00 | 0.95, 1.04  | 0.99 | 0.96, 1.03 |
| <b>Multivariable 2</b>             | 0.99 | 0.80, 1.23 | 0.99 | 0.88, 1.12 | 1.00 | 0.96, 1.04  | 1.00 | 0.96, 1.03 |

| <b>Hemorrhagic stroke<sup>b</sup></b> |      |            |      |            |      |            |      |            |
|---------------------------------------|------|------------|------|------------|------|------------|------|------------|
| <b>Age- and energy-adjusted</b>       | 0.98 | 0.93, 1.03 | 0.88 | 0.78, 1.00 | 1.06 | 0.99, 1.13 | 1.03 | 0.97, 1.08 |
| <b>Multivariable 1</b>                | 1.08 | 0.79, 1.47 | 0.87 | 0.68, 1.11 | 1.05 | 0.96, 1.15 | 1.02 | 0.95, 1.09 |
| <b>Multivariable 2</b>                | 1.08 | 0.72, 1.63 | 0.86 | 0.64, 1.16 | 1.04 | 0.95, 1.14 | 1.01 | 0.95, 1.09 |

AREE, activity-related energy expenditure; CABG, coronary artery bypass graft; CHD, coronary heart disease; CVD, cardiovascular disease; HT, hormone therapy; MI, myocardial infarction; PCI, percutaneous coronary intervention.

<sup>a</sup> Models with calibrated total sugars included calibrated estimates of energy, protein, and Na/K intake, and AREE, whereas models with uncalibrated total sugars included uncalibrated estimates of those exposures.

<sup>b</sup> Number of cases: Nonfatal MI = 1,598; Coronary death = 732; Heart failure = 969; CABG = 821; PCI = 1,855; Ischemic stroke = 1,418; Hemorrhagic stroke = 314.

<sup>c</sup> Cox models stratified by 5-yr age groups, and adjusted for age as continuous variable and energy intake (total energy intake in energy substitution models; non-sugars non-alcohol energy in energy partition models);

<sup>d</sup> Additionally adjusted for race/ethnicity (White, Black, Hispanic and other races), education (high school or less, more than high school and College degree or higher), smoking (never, past and current smoker), history of treated hypertension (yes, no), treated hypercholesterolemia (yes, no), family history of CVD (yes, no), HT use (never, estrogen alone and estrogen + progestin user), alcohol (never or past drinker, <1/wk, 1-<7/wk, ≥7/wk), AREE and Na/K intake.

<sup>e</sup> Multivariable 1 + BMI.

**Web Table 2. Calibration Equation Coefficients ( $\beta$ ) and Their Standard Error Estimates for Multivariable Energy Substitution**

**Models for Type 2 Diabetes From the Women's Health Initiative Nutrition and Physical Activity Assessment Study, 2007-2010**

|                                                   | T2D Multivariable model 1 & 2 |                |                | T2D Multivariable model 3 |                |                |
|---------------------------------------------------|-------------------------------|----------------|----------------|---------------------------|----------------|----------------|
|                                                   | Sugars                        | TEI            | AREE           | Sugars                    | TEI            | AREE           |
|                                                   | $\beta$ (SE)                  | $\beta$ (SE)   | $\beta$ (SE)   | $\beta$ (SE)              | $\beta$ (SE)   | $\beta$ (SE)   |
| Intercept                                         | -2.334 (2.890)                | 7.481 (0.140)  | 5.413 (0.474)  | -2.667 (3.098)            | 7.344 (0.165)  | 5.546 (0.564)  |
| Log(FFQ sugars, g/1000 kcal)                      | 0.735 (0.150)                 | 0.003 (0.026)  | 0.107 (0.087)  | 0.705 (0.158)             | 0.006 (0.027)  | 0.130 (0.091)  |
| log(FFQ total energy intake, kcal/d) <sup>a</sup> | 0.114 (0.116)                 | 0.084 (0.020)  | 0.160 (0.068)  | 0.133 (0.123)             | 0.082 (0.021)  | 0.171 (0.072)  |
| Age, <sup>b</sup> y                               | 0.996 (0.605)                 | -0.008 (0.001) | -0.026 (0.005) | 1.061 (0.629)             | -0.009 (0.001) | -0.025 (0.005) |
| BMI, <sup>b,c</sup> kg/m <sup>2</sup>             | -0.260 (0.228)                | 0.013 (0.001)  | 0.012 (0.005)  | -0.206 (0.365)            | 0.011 (0.002)  | 0.019 (0.007)  |
| Alcohol intake                                    |                               |                |                |                           |                |                |
| < 1 drink/week                                    | 0.125 (0.121)                 | 0.065 (0.021)  | 0.131 (0.070)  | 0.119 (0.126)             | 0.067 (0.021)  | 0.133 (0.073)  |
| 1- <7 drinks/week                                 | 0.003 (0.122)                 | 0.065 (0.021)  | 0.056 (0.071)  | 0.002 (0.126)             | 0.069 (0.021)  | 0.055 (0.073)  |
| $\geq$ 7 drinks/week                              | 0.126 (0.159)                 | 0.044 (0.028)  | -0.046 (0.091) | 0.123 (0.167)             | 0.055 (0.028)  | -0.012 (0.095) |
| AREE <sup>d</sup>                                 | 0.029 (0.097)                 | 0.019 (0.017)  | 0.104 (0.057)  | 0.048 (0.101)             | 0.021 (0.017)  | 0.101 (0.060)  |

|                                          |                |                |                |                |                |                |
|------------------------------------------|----------------|----------------|----------------|----------------|----------------|----------------|
| Race/ethnicity                           |                |                |                |                |                |                |
| Black                                    | 0.073 (0.138)  | -0.028 (0.024) | -0.011 (0.081) | 0.117 (0.149)  | -0.026 (0.025) | -0.014 (0.087) |
| Hispanic                                 | 0.224 (0.146)  | -0.106 (0.025) | -0.028 (0.083) | 0.198 (0.152)  | -0.098 (0.026) | -0.016 (0.087) |
| Other                                    | 0.269 (0.268)  | -0.032 (0.046) | -0.050 (0.161) | 0.265 (0.273)  | -0.026 (0.046) | -0.037 (0.164) |
| Smoking - Current                        | -0.387 (0.249) | -0.047 (0.043) | -0.108 (0.143) | -0.394 (0.254) | -0.051 (0.043) | -0.101 (0.145) |
| Education                                |                |                |                |                |                |                |
| < High school                            | 0.447 (0.333)  | -0.000 (0.058) | -0.084 (0.206) | 0.422 (0.343)  | -0.000 (0.058) | -0.080 (0.210) |
| High school graduate                     | 0.303 (0.175)  | 0.061 (0.030)  | 0.133 (0.100)  | 0.285 (0.185)  | 0.077 (0.031)  | 0.151 (0.105)  |
| Some college                             | 0.131 (0.101)  | 0.004 (0.017)  | -0.045 (0.058) | 0.120 (0.105)  | 0.010 (0.018)  | -0.045 (0.061) |
| Marital status                           |                |                |                |                |                |                |
| Divorced                                 | 0.016 (0.223)  | -0.000 (0.039) | 0.130 (0.131)  | -0.079 (0.241) | 0.006 (0.041)  | 0.181 (0.142)  |
| Widowed                                  | 0.034 (0.243)  | -0.022 (0.042) | 0.147 (0.142)  | -0.058 (0.261) | -0.021 (0.044) | 0.201 (0.153)  |
| Married/living as married                | 0.069 (0.209)  | -0.040 (0.036) | 0.089 (0.123)  | -0.022 (0.226) | -0.030 (0.038) | 0.137 (0.133)  |
| Estrogen alone use - Yes                 | 0.282 (0.199)  | -0.002 (0.034) | -0.030 (0.114) | 0.293 (0.203)  | -0.006 (0.034) | -0.026 (0.116) |
| Estrogen + progestin use - Yes           | 0.231 (0.301)  | 0.012 (0.052)  | -0.179 (0.184) | 0.262 (0.309)  | 0.002 (0.053)  | -0.141 (0.189) |
| History of treated hypertension -<br>Yes | 0.005 (0.093)  | -0.023 (0.016) | -0.054 (0.054) | 0.014 (0.098)  | -0.024 (0.016) | -0.062 (0.056) |

|                               |                |                |                |                |                |                |
|-------------------------------|----------------|----------------|----------------|----------------|----------------|----------------|
| History of CVD - Yes          | 0.097 (0.202)  | 0.040 (0.034)  | 0.086 (0.123)  | 0.089 (0.211)  | 0.059 (0.035)  | 0.126 (0.128)  |
| Family History of T2D - Yes   | -0.120 (0.098) | 0.041 (0.017)  | 0.093 (0.057)  | -0.099 (0.102) | 0.040 (0.017)  | 0.090 (0.059)  |
| Hypercholesterolemia - Yes    | -0.058 (0.176) | -0.028 (0.030) | -0.164 (0.103) | -0.063 (0.180) | -0.032 (0.030) | -0.155 (0.105) |
| Waist circumference (cm)      |                |                |                | -0.000 (0.005) | 0.001 (0.001)  | -0.003 (0.003) |
| Log(FFQ protein, g/1000 kcal) | 0.185 (0.235)  | -0.015 (0.041) | -0.100 (0.135) | 0.177 (0.245)  | -0.006 (0.041) | -0.114 (0.140) |

AREE: activity-related energy expenditure; BMI: body mass index; CVD: cardiovascular disease; FFQ: food frequency questionnaire; SE, standard error; T2D:

Type 2 Diabetes; TEI: total energy intake.

<sup>a</sup> Log-transformed values are centered at the sample mean.

<sup>b</sup> In models with sugars, age and BMI were log-transformed; otherwise, untransformed values were used, centered at the sample mean.

<sup>c</sup> Body Weight (kg)/Height (m)<sup>2</sup>.

<sup>d</sup> In models with sugars, the square root of AREE was used; otherwise, a log-transformed term was used.

**Web Table 3. Calibration Equation Coefficients ( $\beta$ ) and Their Standard Error Estimates for Multivariable Energy Partition Models for Type 2 Diabetes From the Women's Health Initiative Nutrition and Physical Activity Assessment Study, 2007-2010**

|  | T2D Multivariable model 1 |     |      | T2D Multivariable model 2 |     |      |
|--|---------------------------|-----|------|---------------------------|-----|------|
|  | Sugars                    | TEI | AREE | Sugars                    | TEI | AREE |
|  |                           |     |      |                           |     |      |

|                                                                       | $\beta$ (SE)   | $\beta$ (SE) | $\beta$ (SE)   | $\beta$ (SE)   | $\beta$ (SE) | $\beta$ (SE)   |
|-----------------------------------------------------------------------|----------------|--------------|----------------|----------------|--------------|----------------|
| Intercept                                                             | 4.532 (3.120)  |              | 3.678 (1.079)  | 4.472 (3.333)  |              | 3.693 (1.145)  |
| Log(FFQ sugars, g/d)                                                  | 0.459 (0.116)  |              | 0.132 (0.071)  | 0.469 (0.123)  |              | 0.154 (0.075)  |
| Log(FFQ non-sugars non-alcohol<br>energy intake, kcal/d) <sup>a</sup> | -0.457 (0.236) |              | 0.222 (0.141)  | -0.434 (0.247) |              | 0.242 (0.147)  |
| Age, <sup>b</sup> y                                                   | 0.238 (0.562)  |              | -0.025 (0.005) | 0.209 (0.587)  |              | -0.025 (0.005) |
| BMI, <sup>b,c</sup> kg/m <sup>2</sup>                                 | 0.137 (0.222)  |              | 0.012 (0.005)  | 0.150 (0.346)  |              | 0.019 (0.007)  |
| Alcohol intake                                                        |                |              |                |                |              |                |
| < 1 drink/week                                                        | 0.111 (0.112)  |              | 0.130 (0.070)  | 0.102 (0.116)  |              | 0.133 (0.073)  |
| 1- <7 drinks/week                                                     | -0.075 (0.112) |              | 0.064 (0.069)  | -0.061 (0.117) |              | 0.065 (0.072)  |
| ≥ 7 drinks/week                                                       | 0.015 (0.143)  |              | -0.035 (0.085) | 0.032 (0.151)  |              | 0.000 (0.089)  |
| AREE <sup>d</sup>                                                     | 0.034 (0.023)  |              | 0.110 (0.057)  | 0.031 (0.025)  |              | 0.107 (0.059)  |
| Race/ethnicity                                                        |                |              |                |                |              |                |
| Black                                                                 | 0.047 (0.129)  |              | -0.014 (0.080) | 0.032 (0.140)  |              | -0.019 (0.086) |
| Hispanic                                                              | 0.105 (0.135)  |              | -0.030 (0.083) | 0.082 (0.142)  |              | -0.020 (0.086) |
| Other                                                                 | 0.258 (0.255)  |              | -0.056 (0.160) | 0.232 (0.260)  |              | -0.044 (0.163) |
| Smoking - Current                                                     | -0.476 (0.256) |              | -0.111 (0.142) | -0.515 (0.261) |              | -0.104 (0.144) |

|                                          |                |  |                |                |                |
|------------------------------------------|----------------|--|----------------|----------------|----------------|
| Education                                |                |  |                |                |                |
| < High school                            | 0.258 (0.279)  |  | -0.086 (0.204) | 0.402 (0.302)  | -0.080 (0.209) |
| High school graduate                     | 0.207 (0.155)  |  | 0.124 (0.099)  | 0.203 (0.162)  | 0.142 (0.105)  |
| Some college                             | 0.087 (0.095)  |  | -0.048 (0.058) | 0.104 (0.100)  | -0.048 (0.060) |
| Marital status                           |                |  |                |                |                |
| Divorced                                 | 0.030 (0.215)  |  | 0.122 (0.130)  | -0.065 (0.237) | 0.170 (0.141)  |
| Widowed                                  | 0.034 (0.235)  |  | 0.145 (0.141)  | -0.073 (0.256) | 0.198 (0.152)  |
| Married/living as married                | 0.070 (0.202)  |  | 0.087 (0.122)  | -0.027 (0.222) | 0.134 (0.132)  |
| Estrogen alone use - Yes                 | 0.229 (0.185)  |  | -0.033 (0.113) | 0.272 (0.196)  | -0.029 (0.115) |
| Estrogen + progestin use - Yes           | 0.338 (0.267)  |  | -0.179 (0.183) | 0.350 (0.274)  | -0.138 (0.188) |
| History of treated hypertension -<br>Yes | -0.010 (0.088) |  | -0.056 (0.053) | 0.009 (0.092)  | -0.063 (0.056) |
| History of CVD - Yes                     | 0.162 (0.186)  |  | 0.072 (0.119)  | 0.154 (0.193)  | 0.113 (0.124)  |
| Family history of T2D - Yes              | -0.114 (0.091) |  | 0.097 (0.056)  | -0.068 (0.096) | 0.096 (0.058)  |
| Hypercholesterolemia - Yes               | -0.016 (0.158) |  | -0.160 (0.102) | -0.035 (0.162) | -0.150 (0.104) |
| Waist circumference, cm                  |                |  |                | 0.000 (0.005)  | -0.003 (0.003) |
| Log(FFQ protein, g/d)                    | 0.189 (0.224)  |  | -0.191 (0.134) | 0.176 (0.233)  | -0.219 (0.138) |



AREE: activity-related energy expenditure; BMI: body mass index; CVD: cardiovascular disease; FFQ: food frequency questionnaire; SE, standard error; T2D:

Type 2 Diabetes; TEI: total energy intake.

<sup>a</sup> Log-transformed values are centered at the sample mean.

<sup>b</sup> In models with sugars, age and BMI were log-transformed; otherwise, untransformed values were used, centered at the sample mean.

<sup>c</sup> Body Weight (kg)/Height (m)<sup>2</sup>.

<sup>d</sup> In models with sugars, the square root of AREE was used; otherwise, a log-transformed term was used.

**Web Table 4. Calibration Equation Coefficients and Their Standard Error Estimates for Multivariable Energy Substitution and Energy Partition Models for Cardiovascular Disease From the Women’s Health Initiative Nutrition and Physical Activity Assessment Study, 2007-2010**

|                              | Energy Substitution Multivariable Model 1 & 2 |                |               |                | Energy Partition Multivariable Model 1 & 2 |     |               |                |
|------------------------------|-----------------------------------------------|----------------|---------------|----------------|--------------------------------------------|-----|---------------|----------------|
|                              | Sugars                                        | TEI            | AREE          | Na/K           | Sugars                                     | TEI | AREE          | Na/K           |
| Intercept                    | -1.324 (2.817)                                | 7.546 (0.173)  | 5.484 (0.564) | -0.123 (0.552) | 1.853 (2.752)                              |     | 5.107 (0.631) | 0.785 (0.597)  |
| Log(FFQ sugars, g/1000 kcal) | 0.459 (0.198)                                 | -0.009 (0.035) | 0.135 (0.113) | 0.041 (0.109)  |                                            |     |               |                |
| Log(FFQ sugars, g/d)         |                                               |                |               |                | 0.235 (0.151)                              |     | 0.101 (0.090) | 0.038 (0.0.87) |

|                                                                    |                |                |                |                |                |  |                |                |
|--------------------------------------------------------------------|----------------|----------------|----------------|----------------|----------------|--|----------------|----------------|
| log(FFQ total energy intake, kcal/d) <sup>a</sup>                  | 0.193 (0.115)  | 0.078 (0.020)  | 0.151 (0.067)  | -0.086 (0.064) |                |  |                |                |
| Log(FFQ non-sugars non-alcohol energy intake, kcal/d) <sup>a</sup> |                |                |                |                | 0.016 (0.181)  |  | 0.066 (0.107)  | -0.130 (0.106) |
| Age, <sup>b</sup> y                                                | 1.092 (0.579)  | -0.007 (0.001) | -0.022 (0.005) | -0.001 (0.004) | 0.457 (0.547)  |  | -0.022 (0.005) | 0.000 (0.004)  |
| BMI, <sup>b,c</sup> kg/m <sup>2</sup>                              | -0.273 (0.225) | 0.014 (0.001)  | 0.013 (0.004)  | 0.012 (0.004)  | 0.050 (0.218)  |  | 0.013 (0.004)  | 0.012 (0.004)  |
| Alcohol intake                                                     |                |                |                |                |                |  |                |                |
| < 1 drink/week                                                     | 0.108 (0.116)  | 0.042 (0.020)  | 0.077 (0.067)  | 0.019 (0.062)  | 0.078 (0.109)  |  | 0.076 (0.067)  | 0.020 (0.062)  |
| 1- <7 drinks/week                                                  | 0.018 (0.120)  | 0.042 (0.021)  | 0.007 (0.069)  | -0.085 (0.063) | -0.098 (0.112) |  | 0.009 (0.068)  | -0.089 (0.062) |
| ≥ 7 drinks/week                                                    | 0.019 (0.157)  | 0.034 (0.028)  | -0.042 (0.089) | -0.072 (0.085) | -0.093 (0.142) |  | -0.051 (0.083) | -0.080 (0.080) |
| AREE <sup>d</sup>                                                  | 0.049 (0.094)  | 0.022 (0.017)  | 0.113 (0.055)  | 0.014 (0.051)  | 0.032 (0.023)  |  | 0.115 (0.054)  | 0.013 (0.051)  |
| Log(Na/K, mg/d) <sup>a</sup>                                       | -0.280 (0.213) | -0.032 (0.038) | -0.077 (0.122) | 0.487 (0.126)  | -0.381 (0.215) |  | -0.122 (0.126) | 0.521 (0.131)  |
| Race/ethnicity                                                     |                |                |                |                |                |  |                |                |
| Black                                                              | 0.095 (0.132)  | -0.004 (0.023) | 0.053 (0.077)  | 0.255 (0.074)  | 0.096 (0.127)  |  | 0.066 (0.077)  | 0.247 (0.074)  |
| Hispanic                                                           | 0.230 (0.145)  | -0.090 (0.025) | 0.010 (0.082)  | 0.174 (0.078)  | 0.109 (0.136)  |  | 0.012 (0.082)  | 0.172 (0.077)  |
| Other                                                              | 0.444 (0.256)  | -0.036 (0.045) | -0.155 (0.151) | -0.036 (0.142) | 0.365 (0.248)  |  | -0.164 (0.151) | -0.035 (0.142) |

|                                          |                |                |                |                |                |  |                |                |
|------------------------------------------|----------------|----------------|----------------|----------------|----------------|--|----------------|----------------|
| Smoking - Current                        | -0.409 (0.246) | -0.041 (0.043) | -0.121 (0.139) | -0.005 (0.132) | -0.414 (0.246) |  | -0.125 (0.139) | -0.006 (0.131) |
| Education                                |                |                |                |                |                |  |                |                |
| Post High school                         | -0.158 (0.150) | -0.021 (0.027) | -0.126 (0.086) | -0.025 (0.079) | -0.098 (0.135) |  | -0.127 (0.086) | -0.023 (0.079) |
| College                                  | -0.309 (0.153) | -0.021 (0.027) | -0.080 (0.088) | -0.145 (0.081) | -0.179 (0.137) |  | -0.081 (0.088) | -0.143 (0.081) |
| Estrogen alone use -<br>Yes              | 0.295 (0.197)  | -0.007 (0.035) | -0.020 (0.111) | 0.263 (0.103)  | 0.246 (0.185)  |  | -0.021 (0.111) | 0.264 (0.103)  |
| Estrogen + progestin<br>use - Yes        | 0.324 (0.301)  | 0.019 (0.053)  | -0.153 (0.182) | 0.232 (0.147)  | 0.374 (0.271)  |  | -0.159 (0.182) | 0.233 (0.147)  |
| History of treated<br>hypertension - Yes | 0.069 (0.091)  | -0.030 (0.016) | -0.087 (0.052) | -0.028 (0.050) | 0.025 (0.087)  |  | -0.087 (0.052) | -0.029 (0.049) |
| Family History of CVD<br>- Yes           | -0.124 (0.092) | -0.018 (0.016) | -0.005 (0.052) | 0.101 (0.049)  | -0.057 (0.087) |  | -0.006 (0.052) | 0.103 (0.049)  |
| Hypercholesterolemia<br>- Yes            | 0.078 (0.168)  | -0.008 (0.030) | -0.140 (0.097) | -0.061 (0.088) | 0.093 (0.155)  |  | -0.138 (0.096) | -0.061 (0.088) |
| Income, annual                           |                |                |                |                |                |  |                |                |
| \$20 – 34K                               |                |                |                | 0.059 (0.103)  |                |  |                | 0.057 (0.103)  |
| \$35 – 49K                               |                |                |                | 0.053 (0.102)  |                |  |                | 0.054 (0.102)  |

|                          |  |  |  |                |  |  |  |                |
|--------------------------|--|--|--|----------------|--|--|--|----------------|
| \$50 – 74K               |  |  |  | 0.143 (0.103)  |  |  |  | 0.143 (0.103)  |
| ≥ 75K                    |  |  |  | 0.034 (0.104)  |  |  |  | 0.032 (0.104)  |
| Supplementation –<br>Yes |  |  |  | -0.070 (0.047) |  |  |  | -0.070 (0.046) |

AREE: activity-related energy expenditure; BMI: body mass index; CVD: cardiovascular disease; FFQ: food frequency questionnaire; SE, standard error; T2D:

Type 2 Diabetes; TEI: total energy intake.

<sup>a</sup> Log-transformed values are centered at the sample mean.

<sup>b</sup> In models with sugars, age and BMI were log-transformed; otherwise, untransformed values were used, centered at the sample mean.

<sup>c</sup> Body Weight (kg)/Height (m)<sup>2</sup>.

<sup>c</sup> In models with sugars, the square root of AREE was used; otherwise, a log-transformed term was used.

**Web Table 5. Baseline Characteristics of Participants in the Women’s Health Initiative Observational Study, Enrolled During 1993 – 1998, and Nutrition and Physical Activity Assessment Study, Enrolled During 2007-2009, in the CVD and T2D analytical cohort**

|  | CVD                  |                  |  | T2D                  |                  |  |
|--|----------------------|------------------|--|----------------------|------------------|--|
|  | WHI OS<br>(n=64,751) | NPAAS<br>(n=342) |  | WHI OS<br>(n=75,320) | NPAAS<br>(n=383) |  |
|  |                      |                  |  |                      |                  |  |

|                                            | <b>N</b> | <b>%</b> | <b>N</b> | <b>%</b> | <b>P-value<sup>a</sup></b> | <b>N</b> | <b>%</b> | <b>N</b> | <b>%</b> | <b>P-value</b> |
|--------------------------------------------|----------|----------|----------|----------|----------------------------|----------|----------|----------|----------|----------------|
| <b>Age group at screening</b>              |          |          |          |          | <0.0001                    |          |          |          |          | <0.0001        |
| ≤59 years                                  | 22300    | 34.5     | 239      | 69.9     |                            | 24399    | 32.4     | 260      | 67.9     |                |
| 60-69 years                                | 28426    | 43.9     | 86       | 25.1     |                            | 33120    | 44.0     | 99       | 25.8     |                |
| ≥70 years                                  | 14025    | 21.7     | 17       | 5.0      |                            | 17801    | 23.6     | 24       | 6.2      |                |
| <b>Race/ethnicity</b>                      |          |          |          |          | <0.0001                    |          |          |          |          | <0.0001        |
| White                                      | 55132    | 85.1     | 226      | 66.1     |                            | 65198    | 86.6     | 261      | 68.1     |                |
| Black                                      | 4391     | 6.8      | 52       | 15.2     |                            | 4577     | 6.1      | 59       | 15.4     |                |
| Hispanic                                   | 2195     | 3.4      | 52       | 15.2     |                            | 2303     | 3.1      | 51       | 13.3     |                |
| Other or unknown                           | 3033     | 4.8      | 12       | 3.5      |                            | 3242     | 4.3      | 12       | 3.1      |                |
| <b>College degree or higher</b>            | 28670    | 44.3     | 176      | 51.5     | 0.020                      | 33314    | 44.2     | 205      | 53.5     | 0.0009         |
| <b>Presently married/living as married</b> | 41509    | 64.1     | 223      | 65.2     | 0.002                      | 48013    | 63.7     | 259      | 67.6     | 0.0006         |
| <b>Family history of T2D</b>               | 19925    | 31.9     | 106      | 32.5     | 0.802                      | 23632    | 31.4     | 123      | 32.1     | 0.755          |
| <b>Family history of CVD</b>               | 43170    | 66.7     | 217      | 63.5     | 0.205                      | 50803    | 68.1     | 237      | 62.2     | 0.014          |
| <b>History of T2D</b>                      | 1957     | 3.0      | 0        | 0.0      | 0.001                      |          |          |          |          |                |

|                                           |       |      |     |      |        |       |      |     |      |         |
|-------------------------------------------|-------|------|-----|------|--------|-------|------|-----|------|---------|
| <b>History of CVD</b>                     |       |      |     |      |        | 14271 | 18.9 | 55  | 14.4 | 0.022   |
| <b>Treated hypertension</b>               | 14229 | 22.0 | 48  | 14.0 | 0.0004 | 17829 | 23.7 | 57  | 14.9 | <0.0001 |
| <b>Smoking status</b>                     |       |      |     |      | 0.178  |       |      |     |      | 0.103   |
| Never                                     | 33155 | 51.2 | 192 | 56.1 |        | 38094 | 50.6 | 213 | 55.6 |         |
| Past                                      | 27732 | 42.8 | 133 | 38.9 |        | 32724 | 43.4 | 153 | 39.9 |         |
| Current                                   | 3864  | 6.0  | 17  | 5.0  |        | 4502  | 6.0  | 17  | 4.4  |         |
| <b>Alcohol intake</b>                     |       |      |     |      | 0.443  |       |      |     |      | 0.186   |
| Never drinker                             | 6772  | 10.5 | 36  | 10.5 |        | 7740  | 10.3 | 39  | 10.2 |         |
| Past drinker                              | 11035 | 17.0 | 49  | 14.3 |        | 12836 | 17.0 | 52  | 13.6 |         |
| < 1 drink/week                            | 20668 | 31.9 | 111 | 32.5 |        | 24092 | 32.0 | 122 | 31.9 |         |
| 1 - <7 drinks/week                        | 17546 | 27.1 | 105 | 30.7 |        | 20438 | 27.1 | 122 | 31.9 |         |
| ≥ 7 drinks/week                           | 8730  | 13.5 | 41  | 12.0 |        | 10214 | 13.6 | 48  | 12.5 |         |
| <b>Use of hormone therapy<sup>b</sup></b> |       |      |     |      |        |       |      |     |      |         |
| Current E-alone                           | 16070 | 24.8 | 80  | 23.4 | 0.540  | 19051 | 25.3 | 100 | 26.1 | 0.713   |
| Current E+P                               | 13940 | 21.5 | 94  | 27.5 | 0.007  | 15723 | 20.9 | 99  | 25.8 | 0.016   |
| <b>Treated high cholesterol</b>           | 8003  | 12.4 | 24  | 7.0  | 0.003  | 10549 | 14.0 | 27  | 7.0  | <0.0001 |

|                                                     |           |                           |           |               |                |           |               |           |               |                |
|-----------------------------------------------------|-----------|---------------------------|-----------|---------------|----------------|-----------|---------------|-----------|---------------|----------------|
| <b>Aspirin use (≥ 80 mg)</b>                        | 11744     | 18.1                      | 45        | 13.2          | 0.017          | 15964     | 21.2          | 60        | 15.7          | 0.0079         |
| <b>Statin use</b>                                   | 4205      | 6.5                       | 11        | 3.2           | 0.014          | 5827      | 7.7           | 11        | 2.9           | 0.0004         |
|                                                     | <b>GM</b> | <b>95% CI<sup>c</sup></b> | <b>GM</b> | <b>95% CI</b> | <b>P-value</b> | <b>GM</b> | <b>95% CI</b> | <b>GM</b> | <b>95% CI</b> | <b>P-value</b> |
| <b>BMI,<sup>d</sup> kg/m<sup>2</sup></b>            | 26.50     | 26.46, 26.54              | 27.24     | 26.64, 27.86  | 0.016          | 26.45     | 26.41, 26.49  | 27.00     | 26.42, 27.59  | 0.064          |
| <b>Waist circumference, cm</b>                      | 83.17     | 83.07, 83.27              | 82.97     | 81.55, 84.41  | 0.769          | 83.10     | 83.01, 83.18  | 82.42     | 81.08, 83.78  | 0.325          |
| <b>FFQ total energy, kcal</b>                       | 1469      | 1465, 1473                | 1542      | 1478, 1608    | 0.024          | 1471      | 1467, 1475    | 1539      | 1481, 1599    | 0.015          |
| <b>Calibrated total energy, kcal</b>                | 2156      | 2155, 2158                | 2250      | 2223, 2277    | <0.0001        | 2173      | 2172, 2175    | 2273      | 2246, 2300    | <0.0001        |
| <b>FFQ total sugars density, g/1000 kcal</b>        | 61.4      | 61.2, 61.5                | 60.0      | 58.0, 62.1    | 0.212          | 61.9      | 61.8, 62.0    | 60.6      | 58.7, 62.5    | 0.183          |
| <b>Calibrated total sugars density, g/1000 kcal</b> | 95.0      | 94.6, 95.3                | 86.4      | 82.3, 90.7    | 0.0001         | 84.3      | 84.1, 84.6    | 78.7      | 76.2, 81.4    | <0.0001        |
| <b>FFQ Protein density, g/1000 kcal</b>             | 41.5      | 41.4, 41.6                | 40.9      | 40.1, 41.7    | 0.177          | 41.5      | 41.4, 41.5    | 41.1      | 40.3, 41.8    | 0.316          |
| <b>Calibrated protein density, g/1000 kcal</b>      | 36.4      | 36.3, 36.4                | 35.8      | 35.3, 36.4    | 0.064          | 34.7      | 34.7, 34.7    | 34.2      | 33.9, 34.5    | 0.005          |

|                               |       |              |       |               |         |       |              |       |               |         |
|-------------------------------|-------|--------------|-------|---------------|---------|-------|--------------|-------|---------------|---------|
| <b>FFQ Na/K</b>               | 0.98  | 0.98, 0.98   | 1.00  | 0.97, 1.03    | 0.226   |       |              |       |               |         |
| <b>Calibrated Na/K</b>        | 1.33  | 1.32, 1.33   | 1.40  | 1.36, 1.44    | <0.0001 |       |              |       |               |         |
| <b>PHQ leisure AREE, kcal</b> | 411.6 | 409.6, 413.5 | 431.3 | 406.7, 457.3  | 0.116   | 407.5 | 405.7, 409.3 | 422.4 | 399.2, 446.9  | 0.210   |
| <b>Calibrated AREE, kcal</b>  | 859.7 | 858.1, 861.4 | 977.6 | 952.0, 1004.0 | <0.0001 | 854.0 | 852.4, 355.6 | 986.2 | 961.6, 1011.4 | <0.0001 |

AREE, activity-related energy expenditure; CI, confidence interval; CVD, cardiovascular disease; FFQ, food frequency questionnaire; GM, geometric mean;

NPAAS, Nutrition and Physical Activity Assessment Study; PHQ, personal habits questionnaire; T2D, Type 2 Diabetes; WHI OS, Women's Health Initiative

Observational Study.

<sup>a</sup> Based on a chi-square or t-test comparing participants in NPAAS versus the remaining WHI-OS participants not enrolled in NPAAS.

<sup>b</sup> Estrogen (E) alone or estrogen (E) + progestin (P) user

<sup>c</sup> Naïve 95% CIs and p-values reported for both uncalibrated and calibrated estimates.

<sup>d</sup> Body Weight (kg)/Height (m)<sup>2</sup>.
